# Supplementary material
Source: publisher figshare collection journal article supplement (https://acs.figshare.com/ndownloader/files/4559725)
Supplement: Supplementary file 1 [file 4559725]

## SUPPORTING INFORMATION

# Optical Properties of Anisotropic Core-Shell Pyramidal Shaped Particles

*Christina M. Sweeney,<sup>†</sup> Warefta Hasan,<sup>†</sup> Colleen L. Nehl <sup>†</sup> and Teri W. Odom<sup>†,‡,\*</sup>*

<sup>†</sup>Department of Chemistry, <sup>‡</sup>Department of Materials Science and Engineering, Northwestern  
University, 2145 Sheridan Road, Evanston, Illinois 60208-3113

\* To whom correspondence should be addressed. E-mail: [todom@northwestern.edu](mailto:todom@northwestern.edu).

Telephone number: 847-491-7674

Fax number: 847-497-7713

Email address: [todom@northwestern.edu](mailto:todom@northwestern.edu)

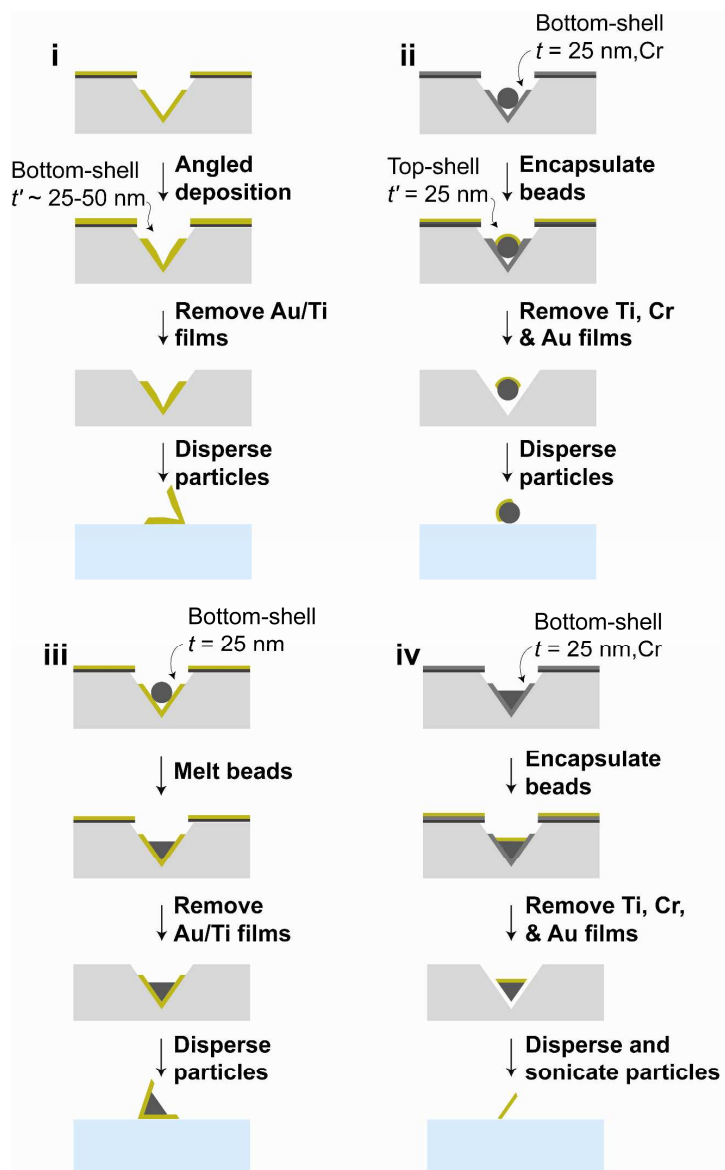

**Figure S1.** Schematic diagrams of the fabrication of individual core-shell components: (i) Au bottom-shell; (ii) spherical PS bead with Au top-shell; (iii) Au bottom-shell with melted PS; and (iv) flat Au top-shell.

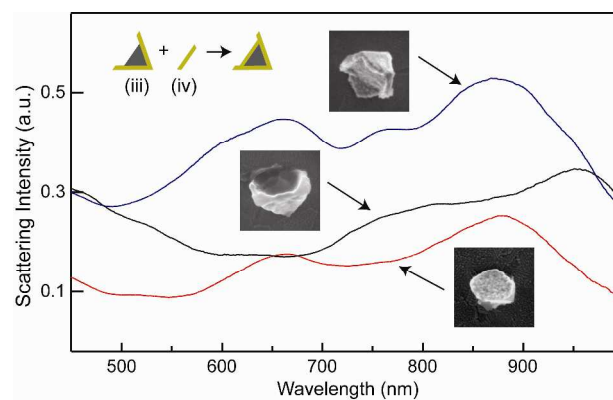

**Figure S2.** Single-particle scattering spectra from Fig. 2 and Fig. 3B under  $n = 1.51$ .

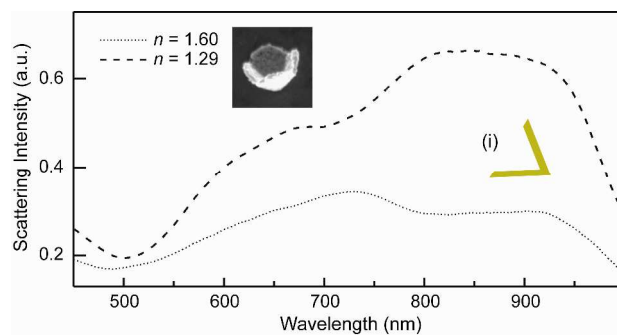

**Figure S3.** Single-particle scattering spectra of (i) Au bottom-shells under bulk  $n = 1.29$  and 1.60. SEM image are 600 x 600 nm.

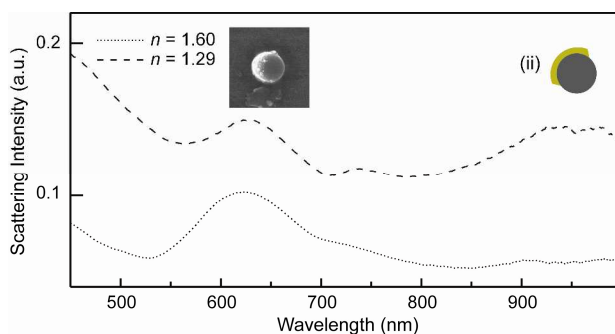

**Figure S4.** Single-particle scattering spectra of (ii) spherical PS bead with Au top-shell under bulk  $n = 1.29$  and 1.60. SEM image are 600 x 600 nm.

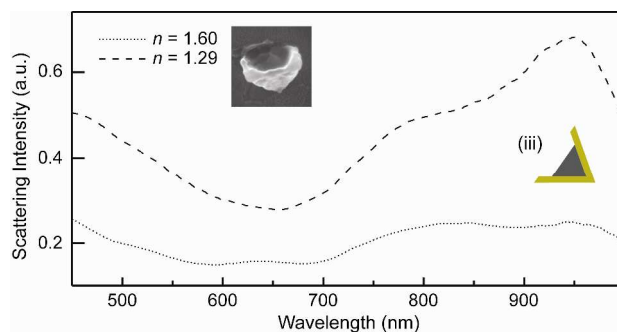

**Figure S5.** Single-particle scattering spectra of (iii) Au bottom-shell with melted PS bead under bulk  $n = 1.29$  and  $1.60$ . SEM image are  $600 \times 600$  nm.

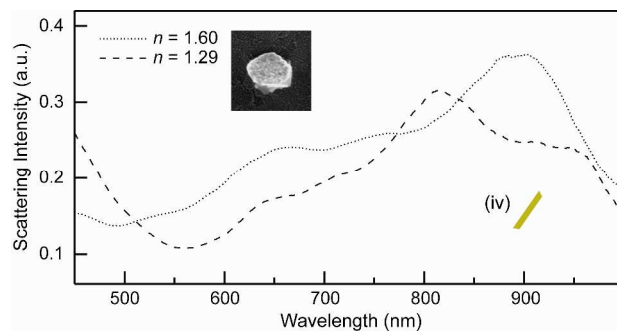

**Figure S6.** Single-particle scattering spectra of (iv) flat Au top-shell under bulk  $n = 1.29$  and  $1.60$ . SEM image are  $600 \times 600$  nm.

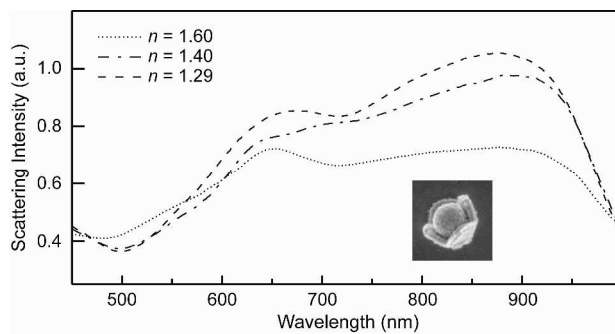

**Figure S7.** Refractive index response of Au-SiO<sub>2</sub>-Au particles under different refractive indices ( $n = 1.29, 1.40$ , and  $1.60$ ). SEM image is  $600 \times 600$  nm.
